# Supplementary material for: PAQR3 modulates cholesterol homeostasis by anchoring Scap/SREBP complex to the Golgi apparatus
Source: PubMed Central journal article supplement (PMC4560833; doi:10.1038/ncomms9100), 2015-08-27
Supplement: ncomms9100-s1.pdf [file ncomms9100-s1.pdf]

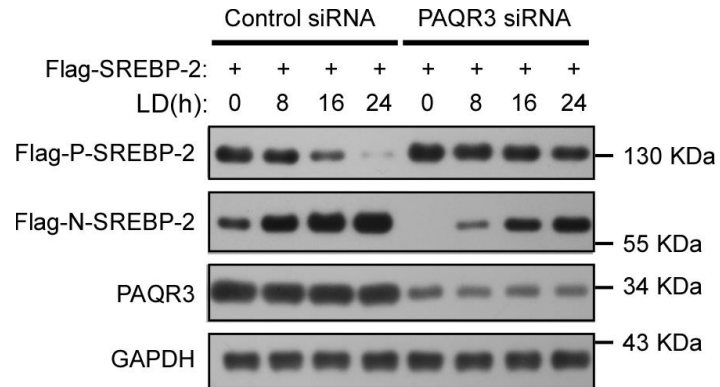

**Supplementary Figure 1. PAQR3 knockdown inhibits SREBP-2 processing in CHO-7 cells**

CHO-7 cells were transfected with control siRNA or a siRNA targeted for hamster PAQR3. At 24 h after the transfection, the cells were transfected with Flag-tagged SREBP-2 and incubated for 24 h. The cells were then treated with lipid depletion (LD) medium for various times as indicated, following by immunoblotting analysis with the antibodies as indicated.

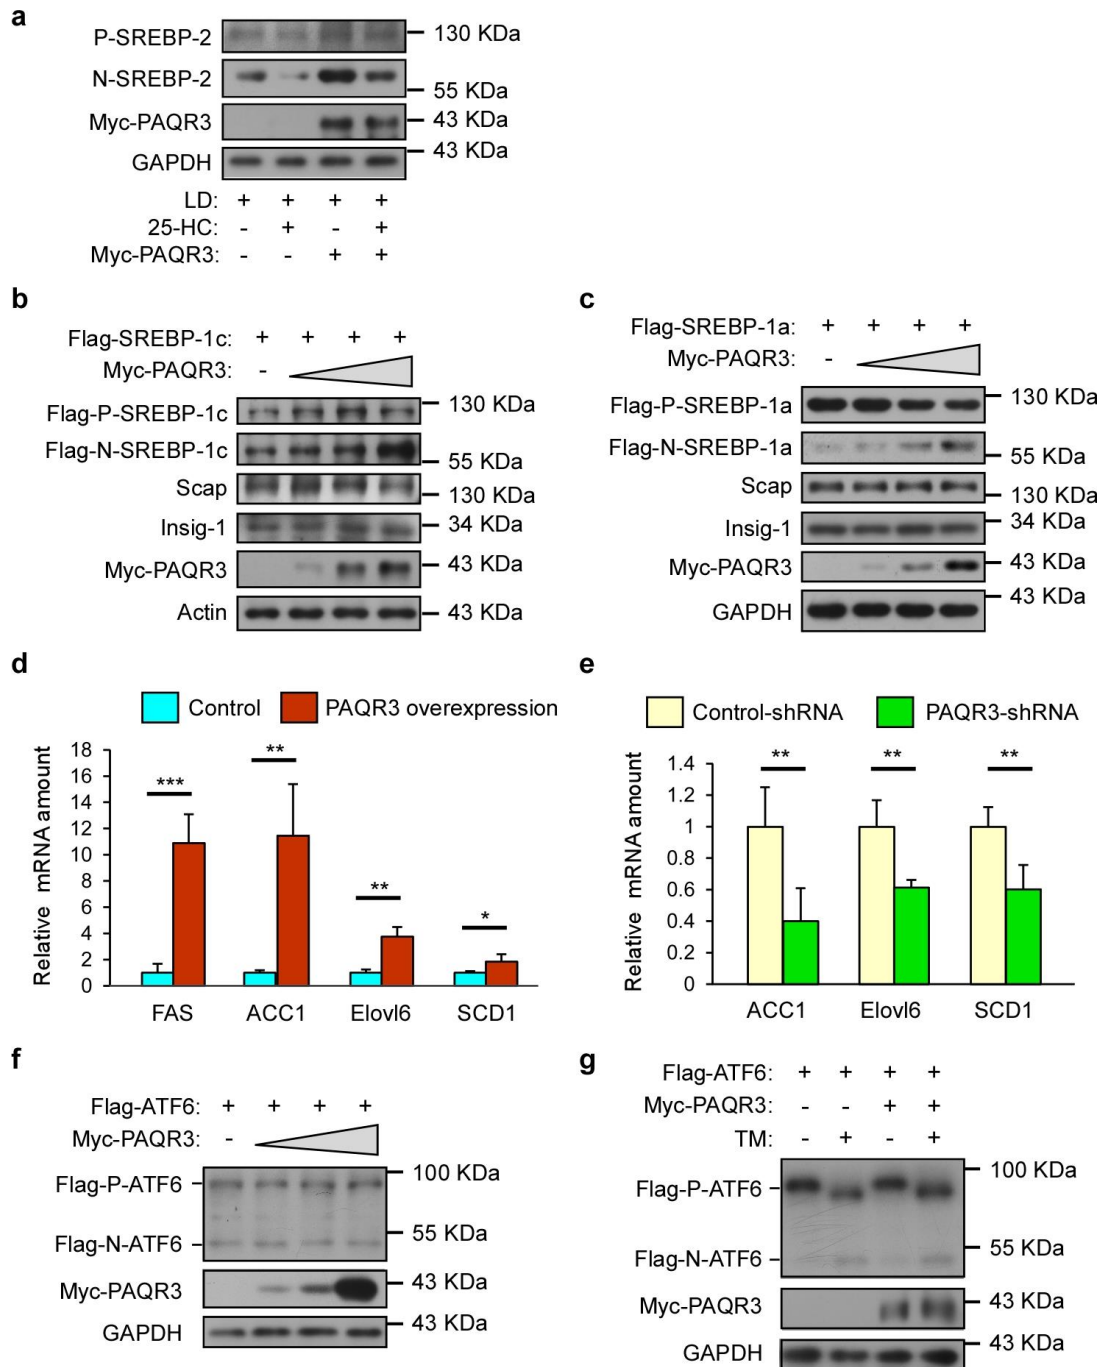

**Supplementary Figure 2. Modulation of SREBPs but not ATF-6 processing by PAQR3**

(a) PAQR3 modulates activation of endogenous SREBP-2. Primary hepatocytes were infected with control or PAQR3-overexpression adenovirus for 24 h and then subjected to

LD medium with or without 25-HC replenishment as indicated. The cell lysate was used in immunoblotting using the antibodies as indicated.

**(b-e)** PAQR3 modulates SREBP-1 activation. Western blot analysis of CHO-7 cells transfected with the plasmids as indicated (**b, c**). Gene expression levels as measured by RT-PCR in HepG2 cells transfected with control plasmid or PAQR3-overexpression plasmid in complete medium (**d**). Gene expression levels as measured by RT-PCR in primary hepatocytes infected with control-shRNA or PAQR3-shRNA adenovirus in complete medium (**e**). All bars show mean  $\pm$  SD, \* $p < 0.05$ , \*\* $p < 0.01$  by Student *t*-test.

**(f-g)** PAQR3 does not affect ATF-6 processing. HEK293T cells were transfected with expression plasmids as indicated. At 24 h after transfection, the cells were harvested directly (**f**) or incubated with 4  $\mu$ M tunicamycin (TM) for 4 h before harvest (**g**). Western blotting was analyzed using the antibodies as indicated. P-ATF6 and N-ATF6 represent precursor and nuclear forms of ATF6 respectively.

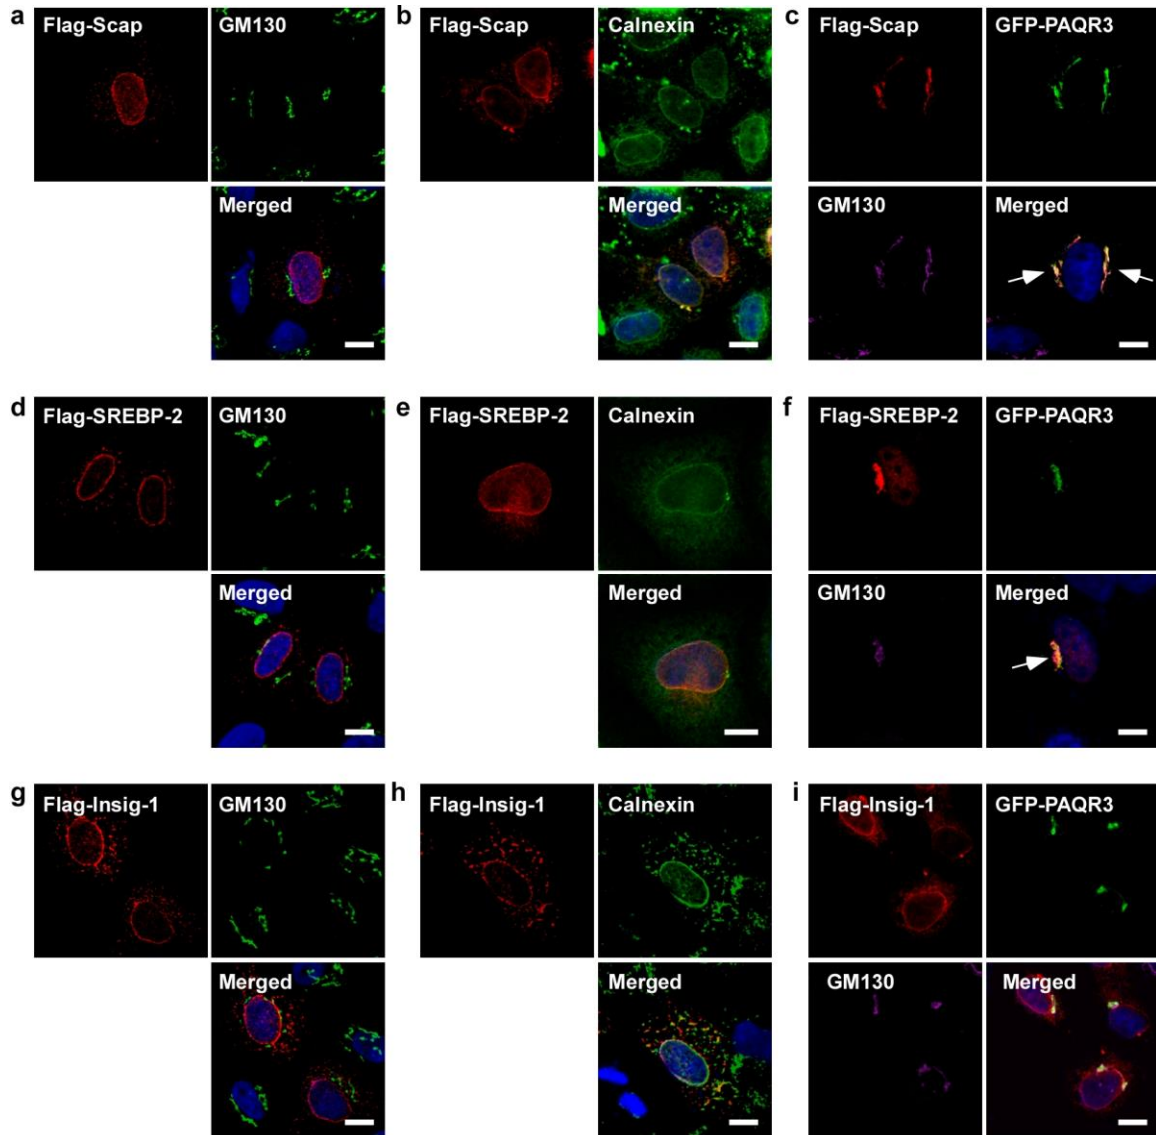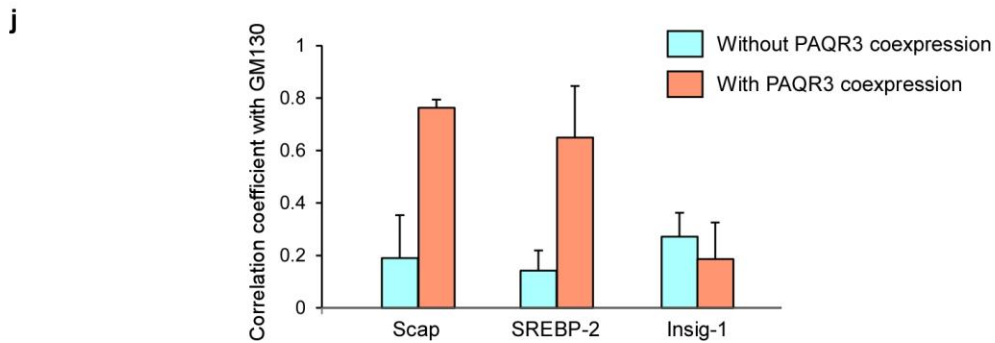

**Supplementary Figure 3. PAQR3 tethers Scap and SREBP-2 to the Golgi apparatus**  
**(a-i)** Overexpression of PAQR3 elevates Golgi localization of Scap and SREBP-2. HeLa cells were transiently transfected with Scap alone (**a, b**), Scap and PAQR3 (**c**), SREBP-2

alone (**d, e**), SREBP-2 and PAQR3 (**f**), Insig-1 alone (**g, h**), Insig-1 and PAQR3 (**i**). The arrows indicate co-localization of PAQR3 with Scap (**c**) or SREBP-2(**f**) in the GA. Localization of Scap and SREBP-2 with calnexin or GM130 calculated by ImageJ is shown in **j**. Scale bar: 10  $\mu\text{m}$ .

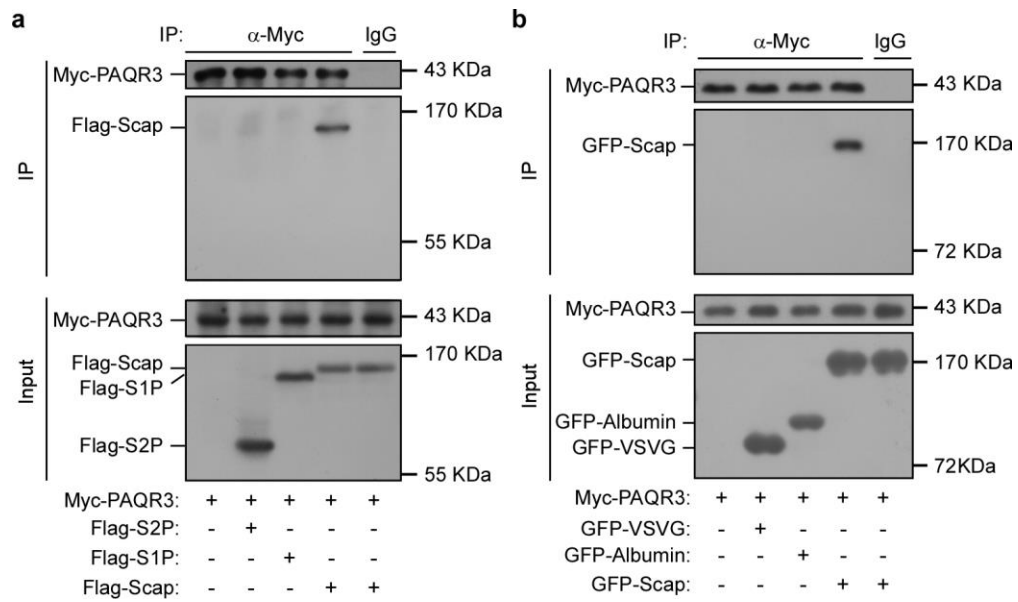

**Supplementary Figure 4. PAQR3 does not interact with S1P, S2P, VSVG, and albumin.**

(a, b) HEK293T cells were transiently transfected with the plasmids as indicated. The cell lysate was used in immunoblotting (IB) and immunoprecipitation (IP) with the antibodies as indicated.

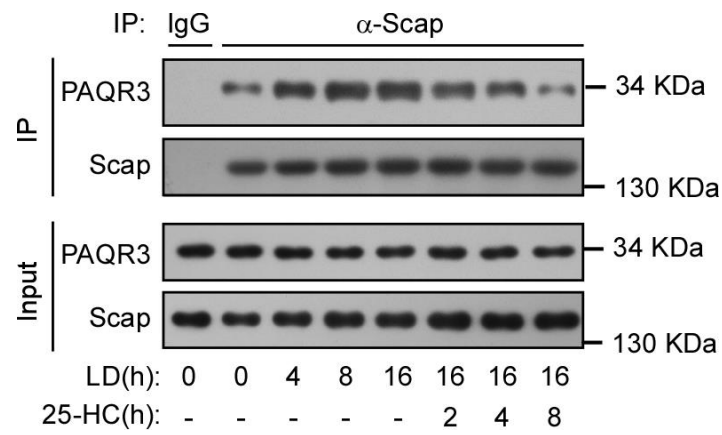

**Supplementary Figure 5. Sterols regulate interaction between endogenous Scap and PAQR3**

CHO-7 cells were subjected to normal medium, LD medium with or without 25-HC replenishment for different time as indicated. The cell lysate was used in immunoprecipitation (IP) and immunoblotting (IB) to detect endogenous Scap and PAQR3.

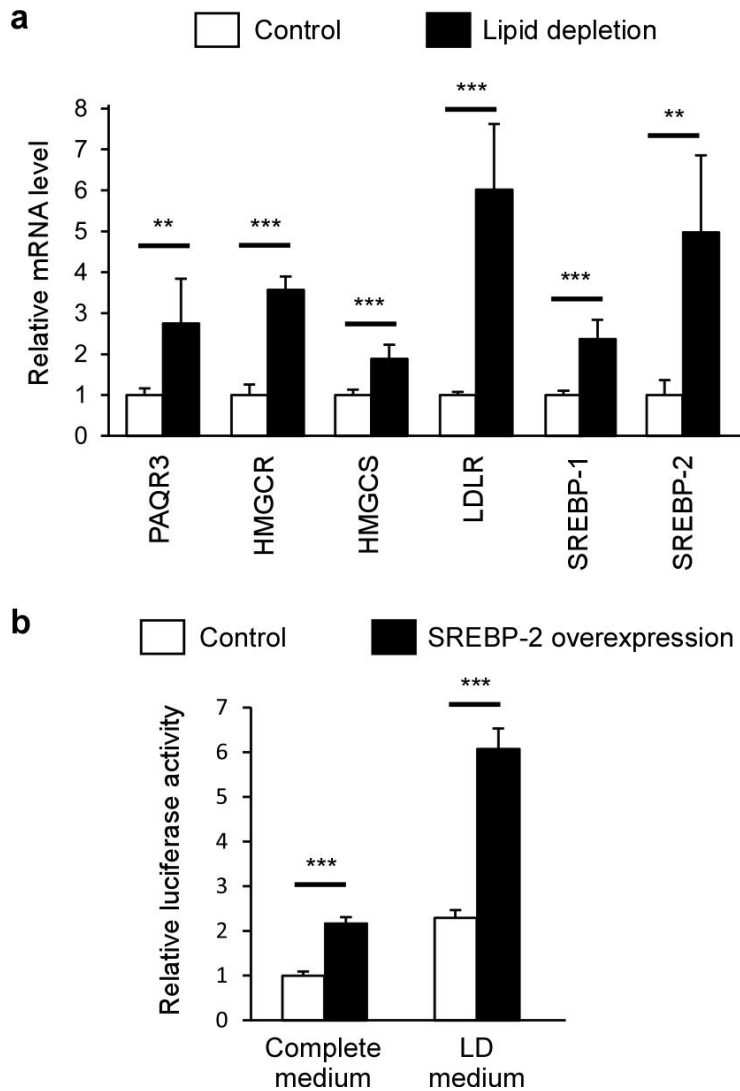

**Supplementary Figure 6. The expression of PAQR3 is elevated by lipid depletion**

(a) Gene expression analysis in HepG2 cells cultured in complete medium or LD medium.

(b) HEK293T cells were transfected with control plasmid or SREBP-2 expression plasmid together with  $\beta$ -galactosidase and a reporter gene containing a 3-kb human PAQR3 promoter. Luciferase activities measured under lipid-loaded (control) and LD conditions were normalized to  $\beta$ -galactosidase activities. All bars show mean  $\pm$  SD, \*\* $p < 0.01$ , \*\*\* $p < 0.001$  by Student *t*-test..



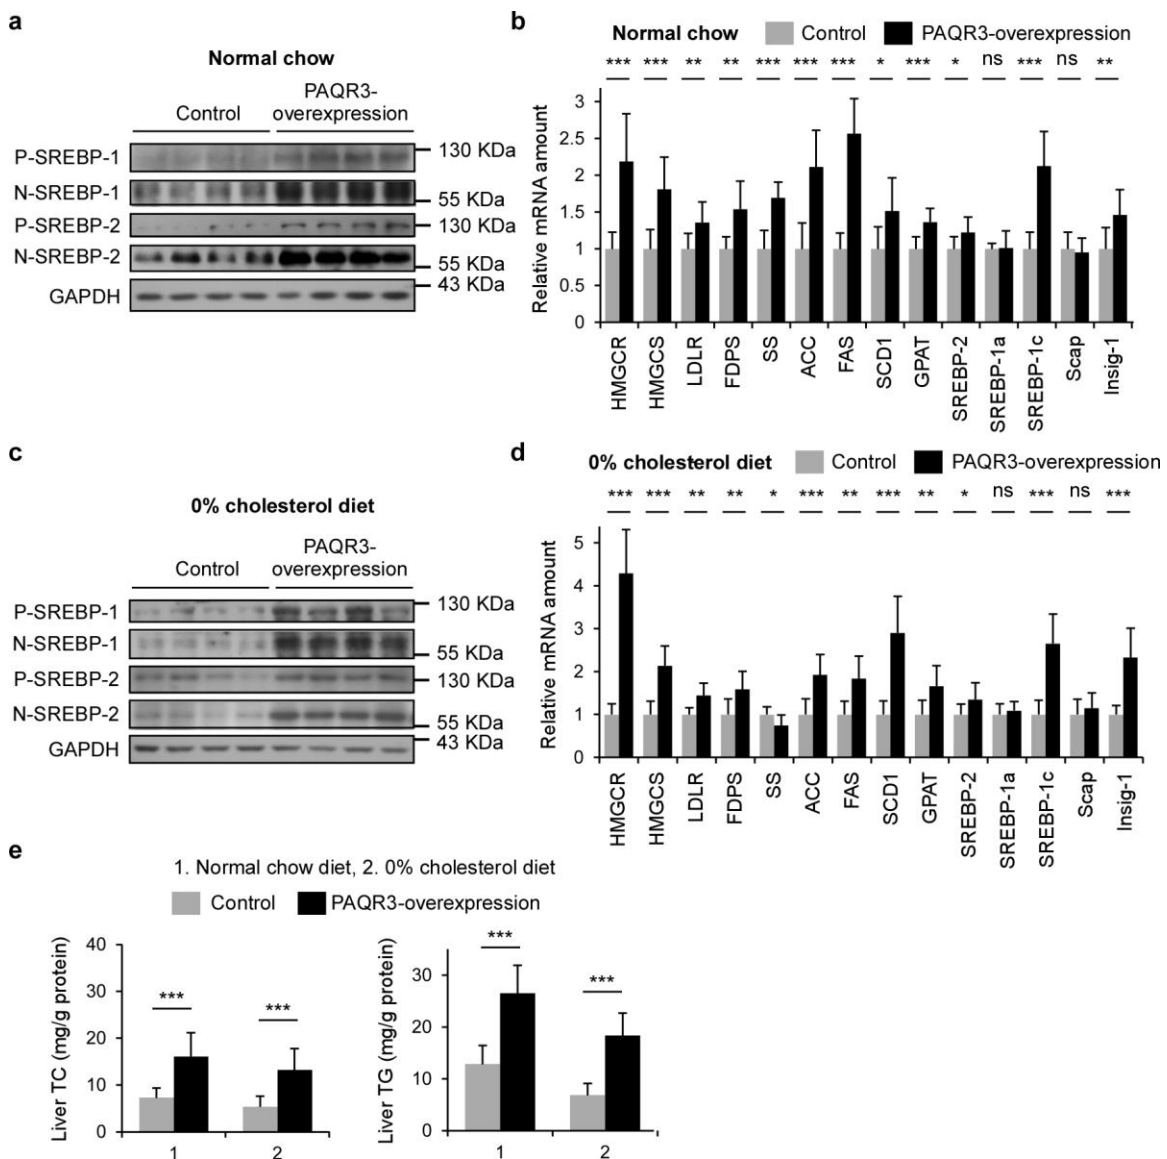

**Supplementary Figure 7. Adenovirus-mediated PAQR3 overexpression in the mouse liver promotes SREBP activation and lipid biosynthesis**

Seven-week-old C57BL/6J mice were injected with control or PAQR3-overexpression adenovirus by tail vein injection. At 7 days after injection, the mice (n = 8 per group) were subjected to normal chow diet and a diet with 0% cholesterol for 3 days, and then sacrificed for analysis. (a, c) Immunoblotting analysis of the mouse liver extracts. (b, d) Gene expression profiles as measured by RT-PCR in the mouse livers. (e) Liver total

cholesterol (TC) and triglyceride (TG) contents. All bars show mean  $\pm$  SD, \* $p < 0.05$ , \*\* $p < 0.01$ , \*\*\* $p < 0.001$  by Student *t*-test.

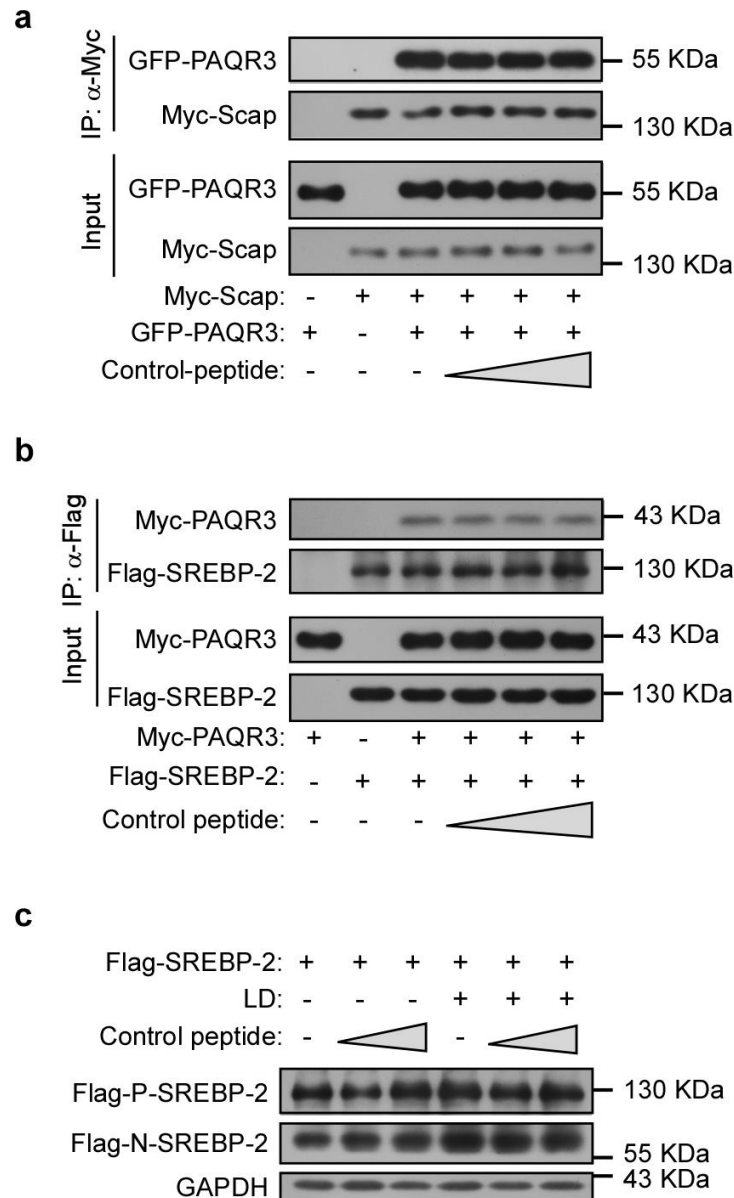

**Supplementary Figure 8. A control peptide does not affect SREBP activation**

(a, b) HEK293T cells were transfected with the plasmids as indicated. At 24 h after transfection, the cells were treated with either PBS or a synthetic control peptide (1, 4 or 20 ng/ $\mu$ l) for 12 h and the cell lysate was used in immunoblotting (IB) and immunoprecipitation (IP) with the indicated antibodies. (c) CHO-7 cell was transfected with Flag-tagged SREBP-2. At 6 h after transfection, the control peptide (4 or 20 ng/ $\mu$ l) was added into the complete medium or LD medium for 16 h. The cell lysate was then used in IB with the indicated antibodies.

a

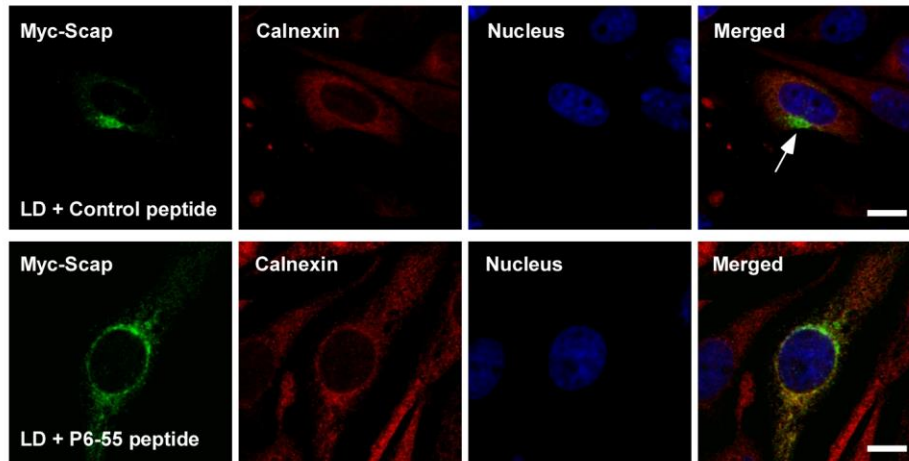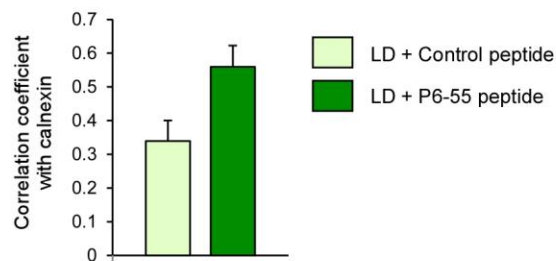

b

| Protocol                                        | Scap localization                                             | Indication                                                                           |
|-------------------------------------------------|---------------------------------------------------------------|--------------------------------------------------------------------------------------|
| Normal medium (24 h)                            | Most in ER                                                    | Scap stays in ER in normal medium                                                    |
| LD medium (90 min)                              | Most in Golgi                                                 | Scap moves to Golgi in LD medium                                                     |
| Add control or P6-55 peptide (6 h) in LD medium | Most in Golgi (control peptide)<br>Most in ER (P6-55 peptide) | Scap stays in Golgi with control peptide<br>Scap moves back to ER with P6-55 peptide |
| Immunofluorescence analysis                     |                                                               |                                                                                      |

**Supplementary Figure 9. PAQR3 affects reverse traffic of Scap from the Golgi apparatus to the ER**

(a) SRD-13A cells were transfected with Myc-tagged Scap and cultured for 24 h. Then the cells were subjected to lipid depletion (LD) medium containing 5% LPDS, 10  $\mu$ M compactin, 50  $\mu$ M mevalonate, 1.5% CDX for 90 min. A control peptide or P6-55 peptide at 20 ng/ $\mu$ l was added in the lipid depletion medium containing 5% LPDS, 10  $\mu$ M compactin and 50  $\mu$ M mevalonate. The cells were incubated for another 6 h before immunofluorescence staining. The arrow indicates LD-induced Golgi localization of Scap. Quantitation of the colocalization of Scap with calnexin calculated by ImageJ is

shown in the lower panel. **(b)** Summary of the protocol, Scap localization and indication of this experiment. The data shown in Figure 2b are also used to draw the conclusions. Scale bar: 10  $\mu\text{m}$ .

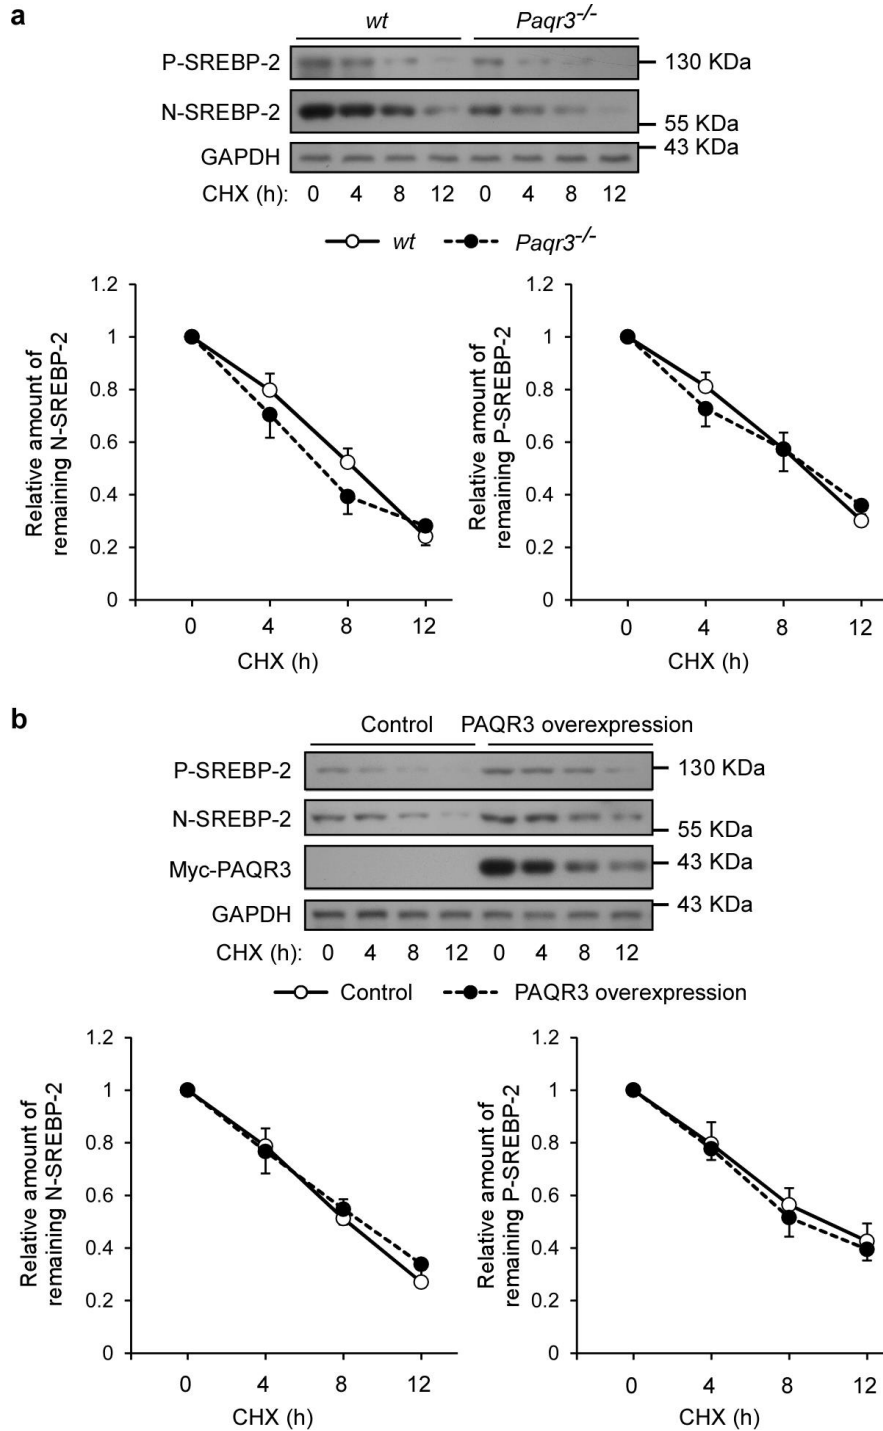

**Supplementary Figure 10. The degradation rate of SREBP-2 is not altered by PAQR3**

Primary hepatocytes from wild type or *Paqr3*<sup>-/-</sup> mice (a) or primary hepatocytes infected with control or Myc-PAQR3 overexpressing adenovirus (b) were treated with 100  $\mu$ g/ml

cycloheximide (CHX) for the time as indicated. The immunoblots were quantified and the data were plotted to illustrate the relative amount of remaining SREBP-2 (the data at 0 h was set to 1).

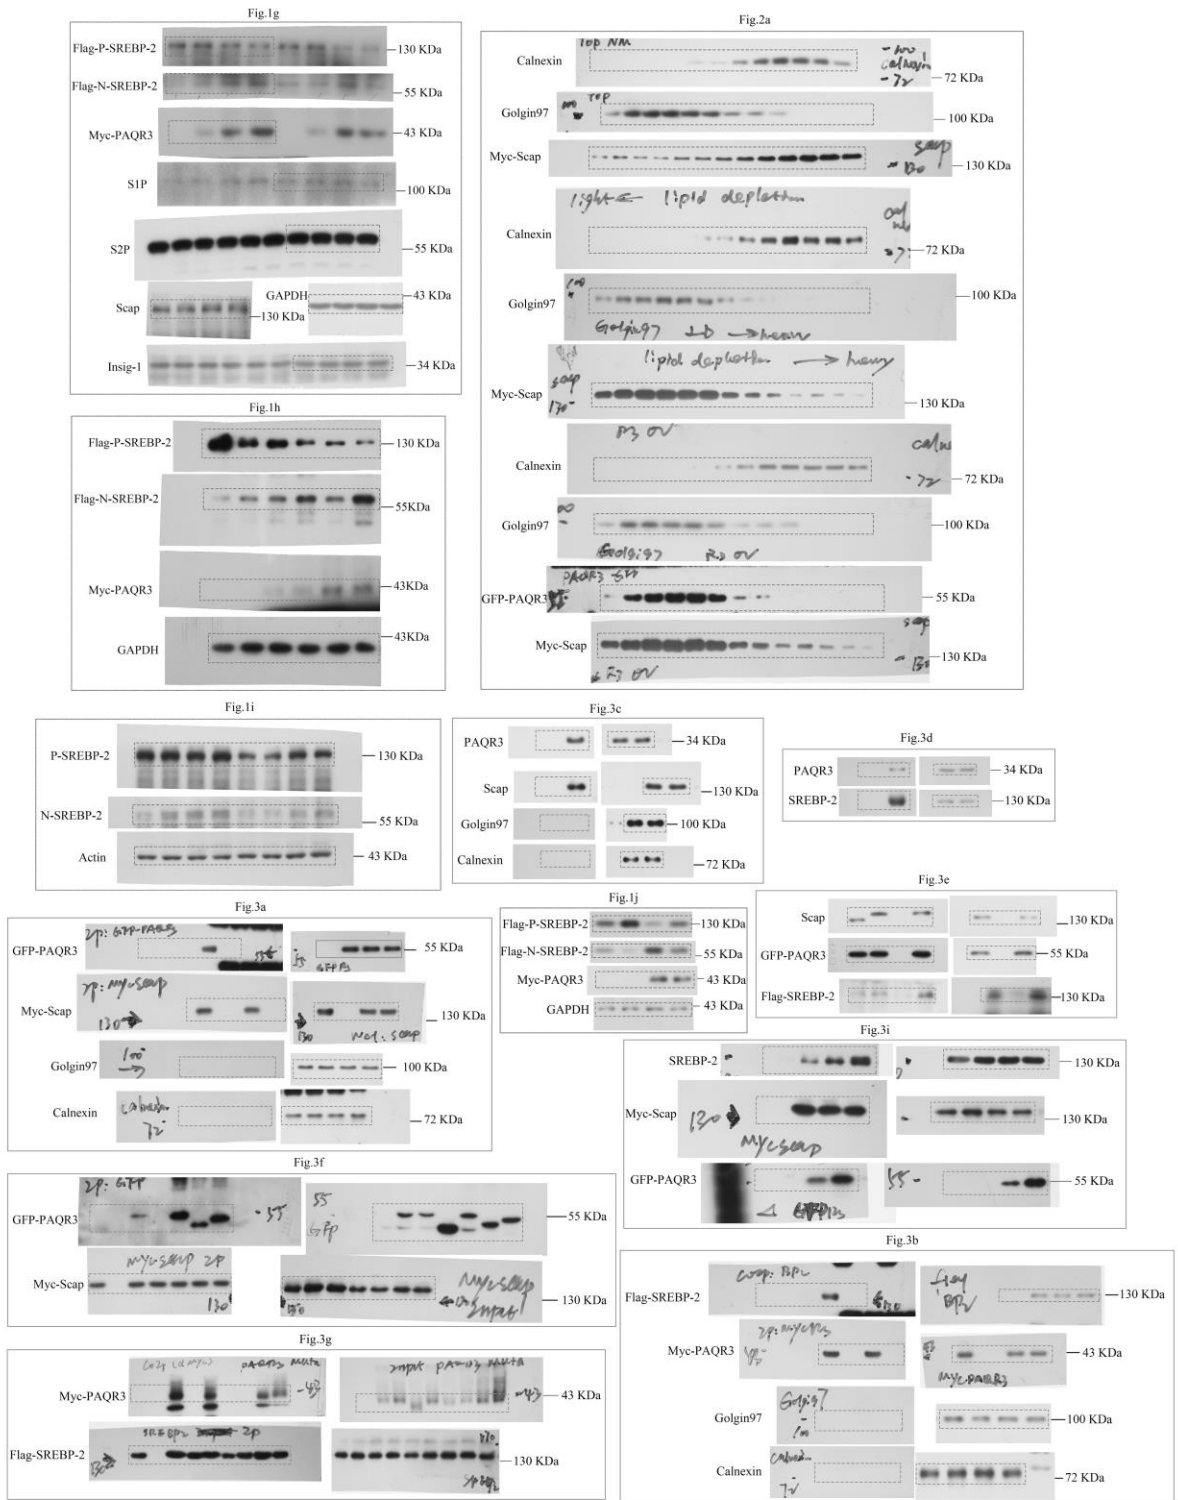

**Supplementary Figure 11. Representative original images of immunoblotting results for Figures 1-7.**



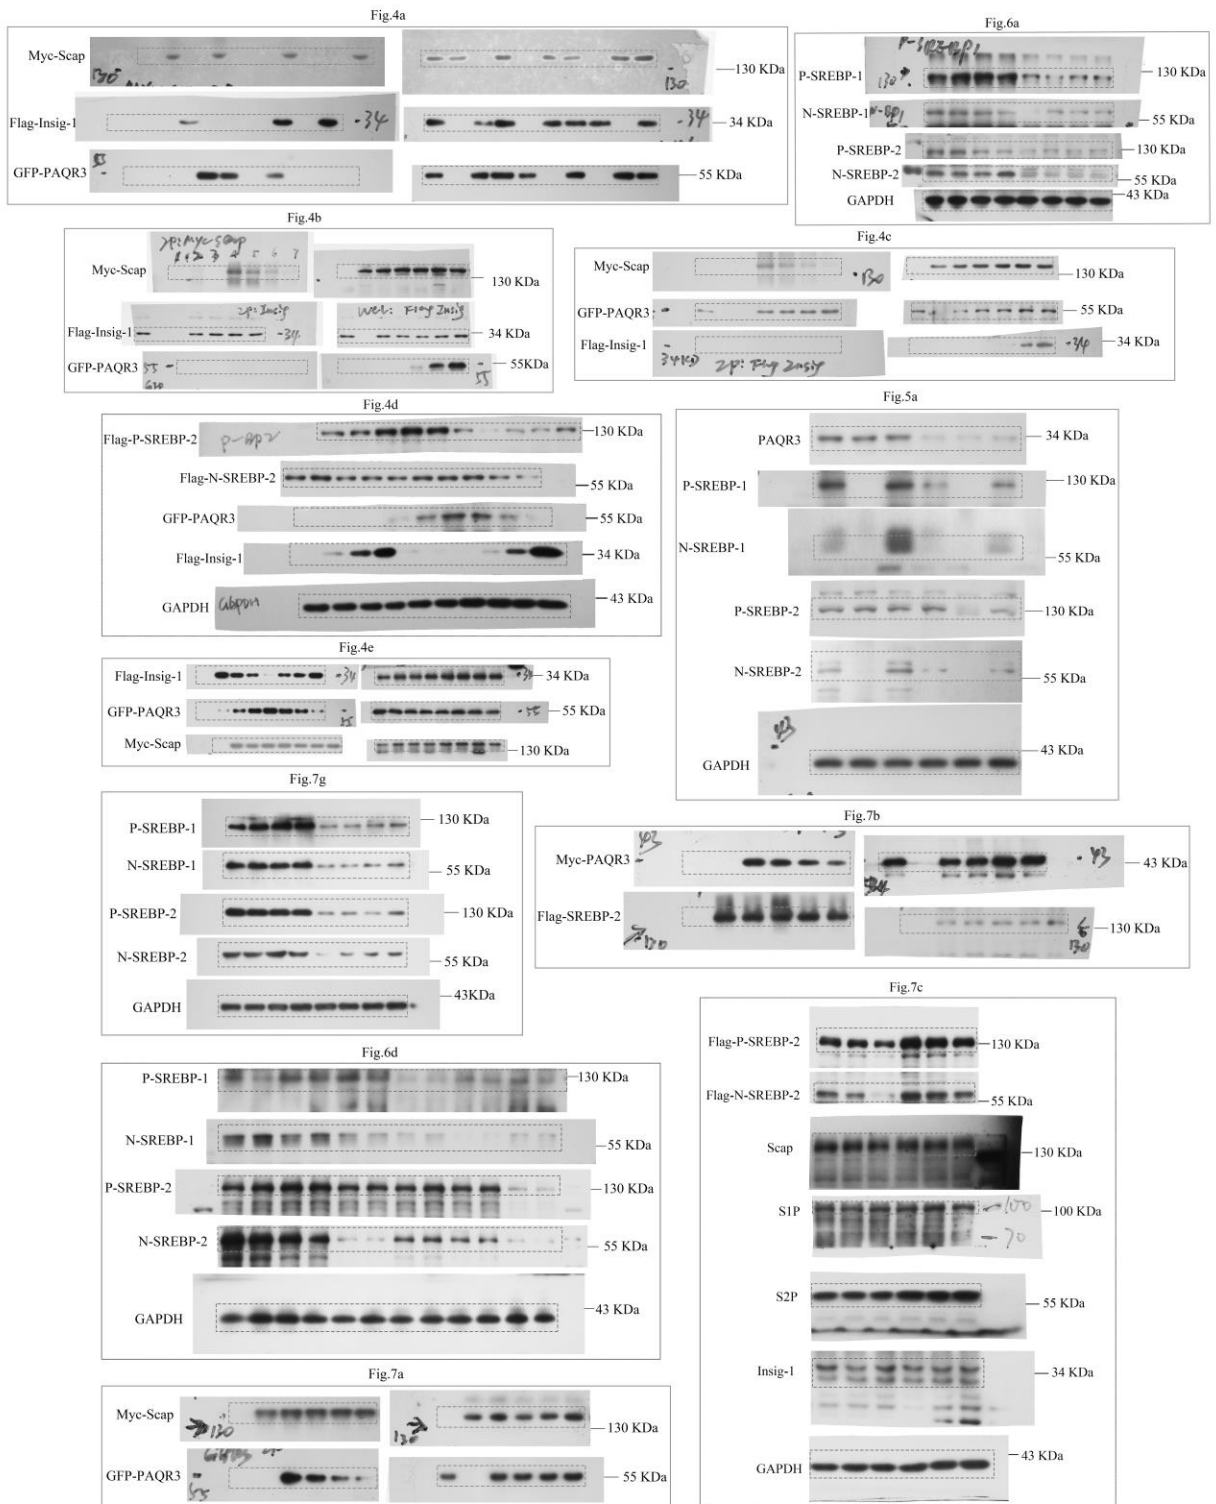

Supplementary Figure 11. Continued

**Supplementary Table 1. Primers used for Real-Time PCR**

| <b>Species</b>      | <b>Gene</b>           | <b>Forward Primer</b>     | <b>Reverse Primer</b>      |
|---------------------|-----------------------|---------------------------|----------------------------|
| <i>Mus musculus</i> | GAPDH                 | TGTGTCCGTCGTGGATCTGA      | CCTGCTTCACCACCTTCTTGAT     |
|                     | SREBP-2               | GCGTCTGGAGACCATGGA        | ACAAAGTTGCTCTGAAAACAAATCA  |
|                     | SCAP                  | ATTTGCTCACCGTGGAGATGTT    | GAAGTCATCCAGGCCACTACTAATG  |
|                     | HMGCS                 | GCCGTGAACTGGGTCGAA        | GCATATATAGCAATGTCTCCTGCAA  |
|                     | HMGCR                 | CTTGTGGAATGCCTTGTGATTG    | AGCCGAAGCAGCACATGAT        |
|                     | FDPS                  | ATGGAGATGGGCGAGTTCTTC     | CCGACCTTCCCGTCACA          |
|                     | SS                    | CCAACCTCAATGGGTCTGTTCCCT  | TGGCTTAGCAAAGTCTTCCAACCT   |
|                     | LDLR                  | AGGCTGTGGGCTCCATAGG       | TGCGGTCCAGGGTCATCT         |
|                     | ACC                   | TGACAGACTGATCGCAGAGAAAAG  | TGGAGAGCCCCACACACA         |
|                     | Fas                   | GCTGCGGAACTTCAGGAAAT      | AGAGACGTGTCACCTCCTGGACTT   |
|                     | SCD-1                 | CCGGAGACCCCTTAGATCGA      | TAGCCTGTAAAAGATTTCTGCAAACC |
|                     | ApoE                  | GCTGGGTGCAGACGCTTT        | TGCCGTCAGTTCTTGTGTGACT     |
|                     | GPAT                  | CAACACCATCCCCGACATC       | GTGACCTTCGATTATGCGATCA     |
|                     | IRS-2                 | GGAGAACCCAGACCCTAAGCTACT  | GATGCCTTTGAGGCCTTCAC       |
|                     | ABCG5                 | TGGATCCAACACCTCTATGCTAAA  | GGCAGGTTTTCTCGATGAACTG     |
|                     | Insig-1               | TCACAGTGACTGAGCTTCAGCA    | TCATCTTCATCACACCCAGGAC     |
|                     | Insig-2a              | CCCTCAATGAATGTACTGAAGGATT | TGTGAAGTGAAGCAGACCAATGT    |
|                     | Insig-2b              | CCGGGCAGAGCTCAGGAT        | GAAGCAGACCAATGTTTCAATGG    |
|                     | PEPCK                 | CCACAGCTGCTGCAGAACA       | GAAGGGTCGCATGGCAAA         |
|                     | SREBP-1a              | GGCCGAGATGTGCGAACT        | TTGTTGATGAGCTGGAGCATGT     |
|                     | ACLY                  | ATATTCATCAGCTTCTCCC       | TCCAAGAAGCCAAATCTTATCCTG   |
|                     | PAQR3                 | GATGGCATTGGATTATGCAG      | AAGCACGGTGATCAGGTACA       |
| SREBP-1C            | GGAGCCATG GATTGCACATT | GCTTCCAGAGAGGAGCCCAG      |                            |
| Elovl6              | ACAATGGACCTGTCAGCAAA  | GTACCAGTGCAGGAAGATCAGT    |                            |
| <i>Homo sapiens</i> | Elovl6                | GCACCCGAACTAGGAGATACA     | CCCCGGCAACCATGTCTTT        |
|                     | SCAP                  | TATCTCGGGCCTTCTACAACC     | GGGGCGAGTAATCCTTCACA       |
|                     | PAQR3                 | AACCCGTACATCACCGACG       | TCTGGACGCACTTGCTGAAG       |

|                               |                |                         |                         |
|-------------------------------|----------------|-------------------------|-------------------------|
|                               | HMGR           | TCTGGCAGTCAGTGGGAACTATT | CCTCGTCCTTCGATCCAATTT   |
|                               | HMGCS          | GATGTGGGAATTGTTGCCCTT   | ATTGTCTCTGTTCCAACCTCCAG |
|                               | LDLR           | AACGGTCATTACCCAGGTC     | GGCTGAAGAATAGGAGTTGCC   |
|                               | SS             | CGATAGCTGTGTGCAAAGTAACT | CCATCTGCTGAGTGCTTTCTG   |
|                               | SREBP-1        | CAGCCCCACTTCATCAAGG     | ACTGTTGCCAAGATGGTTCCG   |
|                               | SREBP-2        | AACGGTCATTACCCAGGTC     | GGCTGAAGAATAGGAGTTGCC   |
|                               | $\beta$ -Actin | GATCATTGCTCCTCTGAGC     | ACTCCTGCTTGCTGATCCAC    |
|                               | ABCG5          | ACCCAAAGCAAGGAACGGGAA   | CAGCGTTCAGCATGCCTGTGT   |
| <i>Cricetulus<br/>griseus</i> | HMGR           | AGATACTGGAGAGTGCCGAGAAA | TTTGTAGGCTGGGATGTGCTT   |
|                               | HMGCS          | CCTGGGTCACTTCCTTTGAATG  | GATCTCAAGGGCAACGATTCC   |
|                               | LDLR           | AGACACATGCGACAGGAATGAG  | GACCCACTTGCTGGCGATA     |
|                               | GAPDH          | GCAAGTTCAAAGGCACAGTCAA  | CGCTCCTGGAAGATGGTGAT    |
|                               | Fas            | AGCCCCTCAAGTGCACAGTG    | TGCCAATGTGTTTTCCCTGA    |
|                               | ACC            | ACACTGGCTGGCTGGACAG     | CACACAACCTCCCAACATGGTG  |
|                               | ABCG5          | GGTGTCTCCATGTCTCCTT     | GCTGCCTAGGATGCACATTA    |
